# Supplementary material for: Unveiling the Role of Nano-Formulated Red Algae Extract in Cancer Management
Source: MDPI journal article supplement (doi:10.3390/molecules29092077), 2024-04-30
Supplement: s1 [file s1]

# Unveiling the Role of Nano-Formulated Red Algae Extract in Cancer Management

Gopalarethinam Janani, Agnishwar Girigoswami, Balasubramanian Deepika, Saranya Udayakumar and Koyeli Girigoswami \*

Medical Bionanotechnology, Faculty of Allied Health Sciences, Chettinad Hospital and Research Institute, Chettinad Academy of Research and Education, Chettinad Health City, Kelambakkam, Chennai 603103, India; jananigopalarethinam98@gmail.com (G.J.); dragnishwar@care.edu.in (A.G.); deepikabalu70@gmail.com (B.D.); usaranyaudayakumar@gmail.com (S.U.)

\* Correspondence: author: koyelig@gmail.com; Tel. +91-9600060358

**Table S1.** The phytochemicals present in aqueous extract of *Amphiroa anceps*.

| S. No | Chemical test                                  | Aqueous extract of <i>Amphiroa anceps</i> |
|-------|------------------------------------------------|-------------------------------------------|
|       | <b><u>Test for Saponin</u></b>                 | +++                                       |
| 1     | Foam Test                                      | +++                                       |
|       | <b><u>Test for Tannins</u></b>                 | +++                                       |
| 2     | Baymer's test                                  | +++                                       |
|       | <b><u>Test for Terpenoids and Steroids</u></b> | -                                         |
| 3     | Salkowski test                                 | -                                         |
|       | <b><u>Test for Flavonoids</u></b>              | +++                                       |
| 4     | Ferric chloride test                           | +++                                       |
|       | <b><u>Tests for Alkaloids</u></b>              | +++                                       |
| 6     | Dragendorff's Test                             | +++                                       |
|       | <b><u>Test for Quinones</u></b>                | -                                         |
| 7     | Sulphuric Acid Test                            | -                                         |
|       | <b><u>Test for Glycosides:</u></b>             | -                                         |
| 8     | Glycoside test                                 | -                                         |
|       | <b><u>Tests for Carbohydrates</u></b>          | +++                                       |
| 9     | Molisch Test                                   | +++                                       |
| 10    | Protein Test                                   | -                                         |
|       | <b><u>Test for Polysaccharides</u></b>         | +++                                       |
| 11    | Iodine Test                                    | +++                                       |

**Note:** +++ → present components; - → absent.

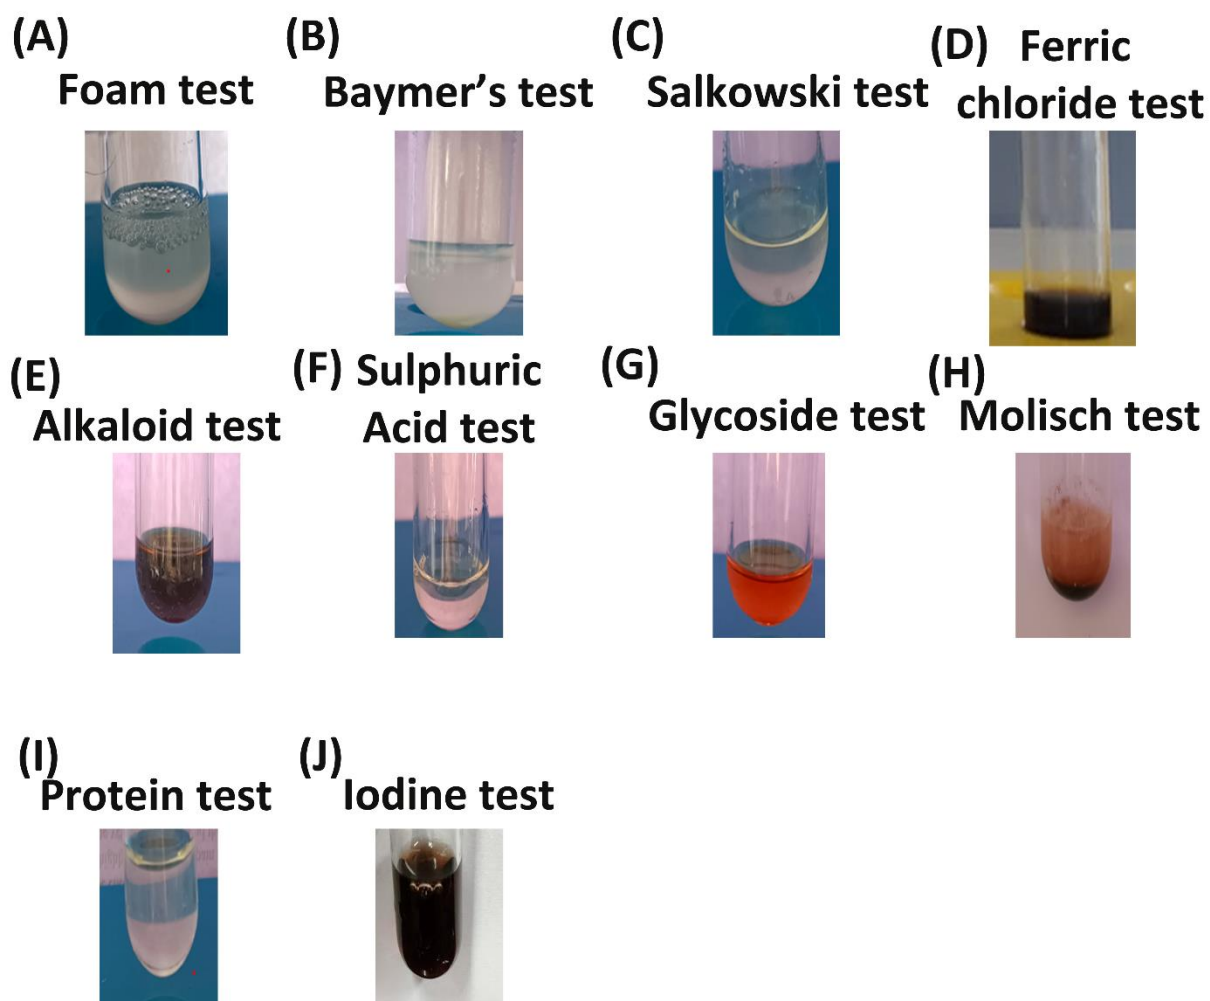

**Figure S1.** Phytochemical analysis of the aqueous extract of *Amphiroa anceps*. The images show the results of (A)-Foam test; (B)- Baymer's Test; (C)- Salkowski test; (D)-Ferric chloride test; (E)-Alkaloid test; (F)-Sulphuric acid test; (G)-Glycoside test; (H)- Molisch test; (I)- protein test; (J)- Iodine test.

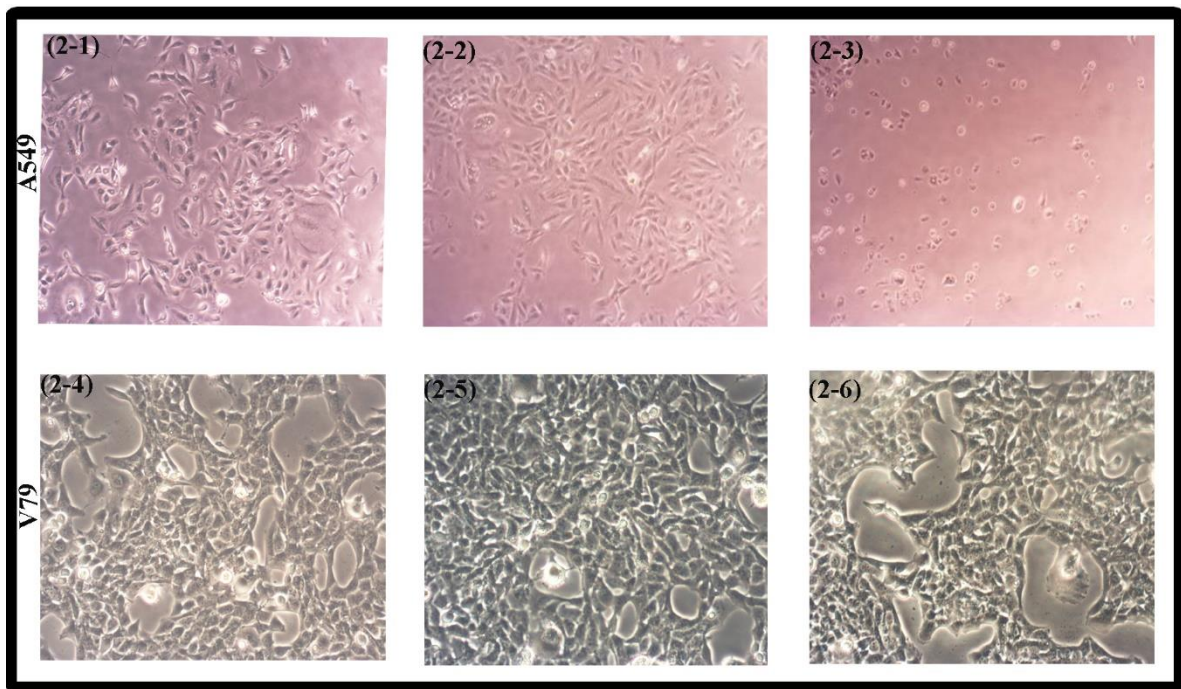

**Figure S2.** The inverted microscopic image of the A549 and V79 cells treated with aqueous extract and liposome formulated aqueous extract of *Amphiroa anceps* at a dose of 100  $\mu\text{g/ml}$  for 24h. (2-1; 2-2; 2-3) shows control and treated cells with HA and NHA for A549 cells; (2-4; 2-5; 2-6) shows control and treated cells with HA and NHA for V79 cells respectively.
